CORRECTION

# Correction: Reading wild minds: A computational assay of Theory of Mind sophistication across seven primate species

The PLOS Computational Biology Staff

The affiliations of Christelle Hano, Giulia Bardino and Michel Saint Jalme are listed incorrectly. The correct affiliations are as follows:

Christelle Hano

**Affiliation:** Museum National d'Histoire Naturelle, UMR 7204, Ménagerie du Jardin des Plantes, Paris, France.

Giulia Bardino

**Affiliation:** Museum National d'Histoire Naturelle, UMR 7206, Universita La Sapienza, Rome, Italy

Michel Saint Jalme

**Affiliation:** Museum National d'Histoire Naturelle, UMR 7204, Ménagerie du Jardin des Plantes, Paris, France.

There is also an error in the author contributions. The listed roles for Shelly Masi should read as follows:

Shelly Masi

**Roles:** Conceptualization, Formal analysis, Funding acquisition, Investigation, Resources, Supervision, Writing—original draft, Writing—review & editing

## Reference

1. Devaine M, San-Galli A, Trapanese C, Bardino G, Hano C, Saint Jalme M, et al. (2017) Reading wild minds: A computational assay of Theory of Mind sophistication across seven primate species. PLoS Comput Biol 13(11): e1005833. <https://doi.org/10.1371/journal.pcbi.1005833> PMID: 29112973

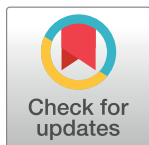

## OPEN ACCESS

**Citation:** The PLOS Computational Biology Staff (2017) Correction: Reading wild minds: A computational assay of Theory of Mind sophistication across seven primate species. PLoS Comput Biol 13(12): e1005917. <https://doi.org/10.1371/journal.pcbi.1005917>

**Published:** December 20, 2017

**Copyright:** © 2017 The PLOS Computational Biology Staff. This is an open access article distributed under the terms of the [Creative Commons Attribution License](https://creativecommons.org/licenses/by/4.0/), which permits unrestricted use, distribution, and reproduction in any medium, provided the original author and source are credited.
